# Supplementary material for: Maternal Exposure to Endocrine-Disrupting Chemicals: Analysis of Their Impact on Infant Gut Microbiota Composition
Source: MDPI journal article supplement (doi:10.3390/biomedicines12010234), 2024-01-19
Supplement: s1 [file s1]

## Supplementary material

**Table S1. General characteristics of mothers included in the study (n = 20).** Data were reported as mean  $\pm$  standard deviation (SD) or median and interquartile range [Q1–Q3] or frequency of subjects expressed as a percentage (%).

| Variables (Cutoff Value or Reference Interval) | Mean $\pm$ SD; Median [Q1–Q3]; % |
|------------------------------------------------|----------------------------------|
| Age (years)                                    | 34                               |
| BMI (kg/m <sup>2</sup> )                       |                                  |
| Underweight (BMI < 18.5)                       |                                  |
| Normal weight (18.5 $\leq$ BMI < 25)           | 23.6 $\pm$ 4.9                   |
| Overweight (25 $\leq$ BMI < 30)                |                                  |
| Obesity (BMI $\geq$ 30)                        |                                  |
| WC (<88 cm)                                    | 81,7 $\pm$ 13.4                  |
| WHtR (<0.5)                                    | 0.5 $\pm$ 0.08                   |

Legend. BMI, Body Mass Index; WC, Waist Circumference; WHtR, Waist to Height Ratio

**Table S2. Maternal lifestyle habits.** Data were reported as mean  $\pm$  standard deviation, median, and interquartile range [Q1–Q3] or frequency of subjects expressed as number (n) and percentage (%).

| Lifestyle Variables                             | Mean $\pm$ SD; Median [Q1–Q3]; % |
|-------------------------------------------------|----------------------------------|
| <i>FF section—food frequency (score)</i>        | 39.3 $\pm$ 4.3                   |
| Less healthy, n (%)                             | 7 (35)                           |
| Moderately healthy, n (%)                       | 7 (35)                           |
| Healthiest, n (%)                               | 6 (30)                           |
| <i>FH section—food habits (score)</i>           | 34.3 $\pm$ 4.8                   |
| Inadequate eating habits, n (%)                 | 7 (35)                           |
| Partially satisfactory eating habits, n (%)     | 7 (35)                           |
| Satisfactory eating habits, n (%)               | 6 (30)                           |
| <i>Physical activity level—IPAQ (METs)</i>      | 1386 [693–2772]                  |
| Sedentary (total METs <699, MET-min), n (%)     | 8 (40)                           |
| Moderate (total METs: 700–2519, MET-min), n (%) | 5 (25)                           |
| High (total METs >2520, MET-min), n (%)         | 7 (35)                           |
| <i>Smoking habit</i>                            |                                  |
| Smokers (%)                                     | 15%                              |
| Non-smokers (%)                                 | 85%                              |

Legend. FF, food frequency section [68]; FH, food habits section [68]; IPAQ, International Physical Activity Questionnaire [69]; MET, metabolic equivalent of task.

**Table S3. Phthalate and BPA exposure determinants.** Phthalate and BPA exposure determinants were explored through a structured interview extrapolating questions from the LIFE PERSUADED (“Phthalates and bisphenol A biomonitoring in Italian mother–child pairs: link between exposure and juvenile diseases”) Project questionnaire [70]. Data are listed as the frequency of subjects that report lifestyle habits. The determinants of exposure are expressed as percentages.

| Determinants of exposure                                                                               | Percentage |
|--------------------------------------------------------------------------------------------------------|------------|
| Use of plastic products for daily personal care (lotions, make-up, dental care, glasses, gloves)       | 75%        |
| Presence of PVC in home, working and recreational environments                                         | 50%        |
| Consumption of packaged food in plastic containers or film-wrapped food, canned (or tetra packed) food | 75%        |
| Consumption of packaged food or pre-cooked food to heat                                                | 20%        |
| Cooked takeaway food consumption                                                                       | 60%        |
| Disposable plastic use                                                                                 | 10%        |
| Frequent use of plastic containers for storage of cooked or raw food                                   | 65%        |
| Use of dishwasher to clean plastic containers                                                          | 35%        |
| Use of film wrap to package and store food for consumption                                             | 65%        |
| Use of microwave to cook or defrost food                                                               | 60%        |
| Regular use of plastic utensils for cooking                                                            | 40%        |
| Consumption of water from plastic bottles                                                              | 40%        |
| Consumption of sauces or dressings in plastic containers                                               | 50%        |
| Packaged dressings or condiments from the original packaging                                           | 70%        |

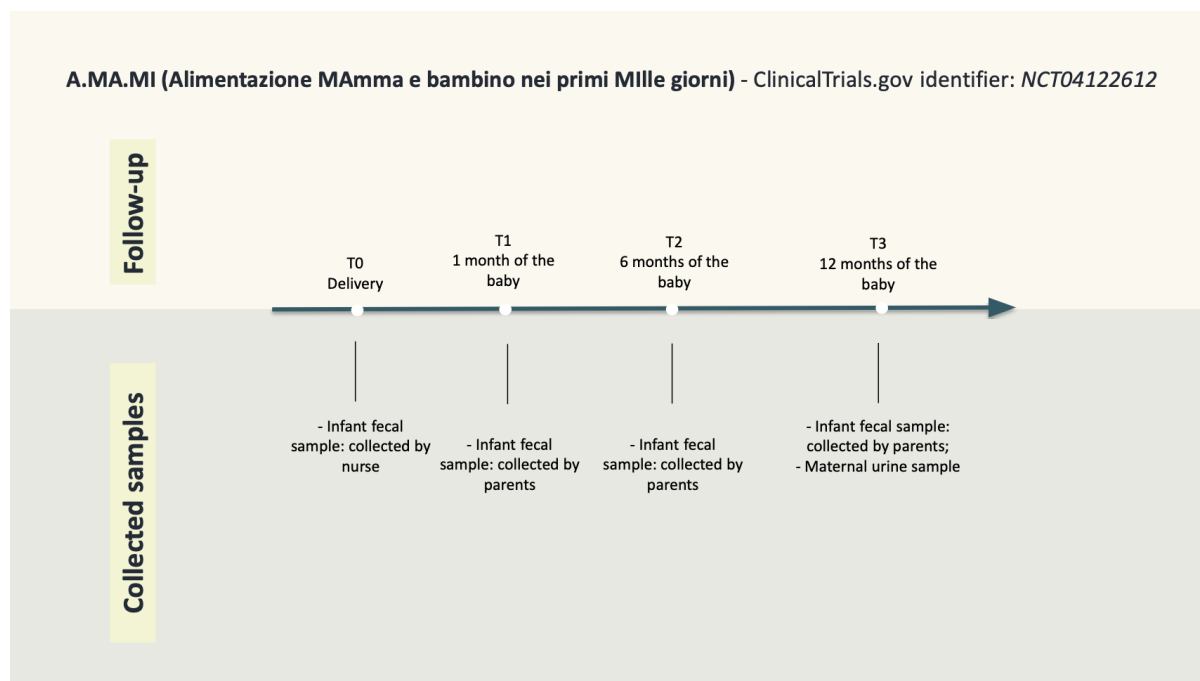

**Figure S1.** Timeline of sample collection of the A.MA.MI (Alimentazione Mamma e bambino nei primi Mille giorni) project [13].
